# Supplementary material
Source: PubMed Central journal article supplement (PMC4689641)
Supplement: NIHMS738472-supplement.pdf [file NIHMS738472-supplement.pdf]

# **Crosstalk between RyR2 Oxidation and Phosphorylation Contributes to Cardiac dysfunction in Mice with Duchenne Muscular Dystrophy**

Qiongling Wang PhD, Wei Wang PhD, Guoliang Wang PhD, George Rodney PhD, Xander H.T. Wehrens, MD PhD

## **SUPPLEMENTAL METHODS**

**ROS measurement by DHE.** Reactive oxygen species production was also determined using the fluorescent dye dihydroethidium (DHE). Cardiomyocytes were incubated with 5  $\mu$ M DHE at for 30 min. Images were captured on a Zeiss LSM 510 microscope and pixel intensity of the cells was measured using ImageJ software.

## **SUPPLEMENTAL FIGURES**

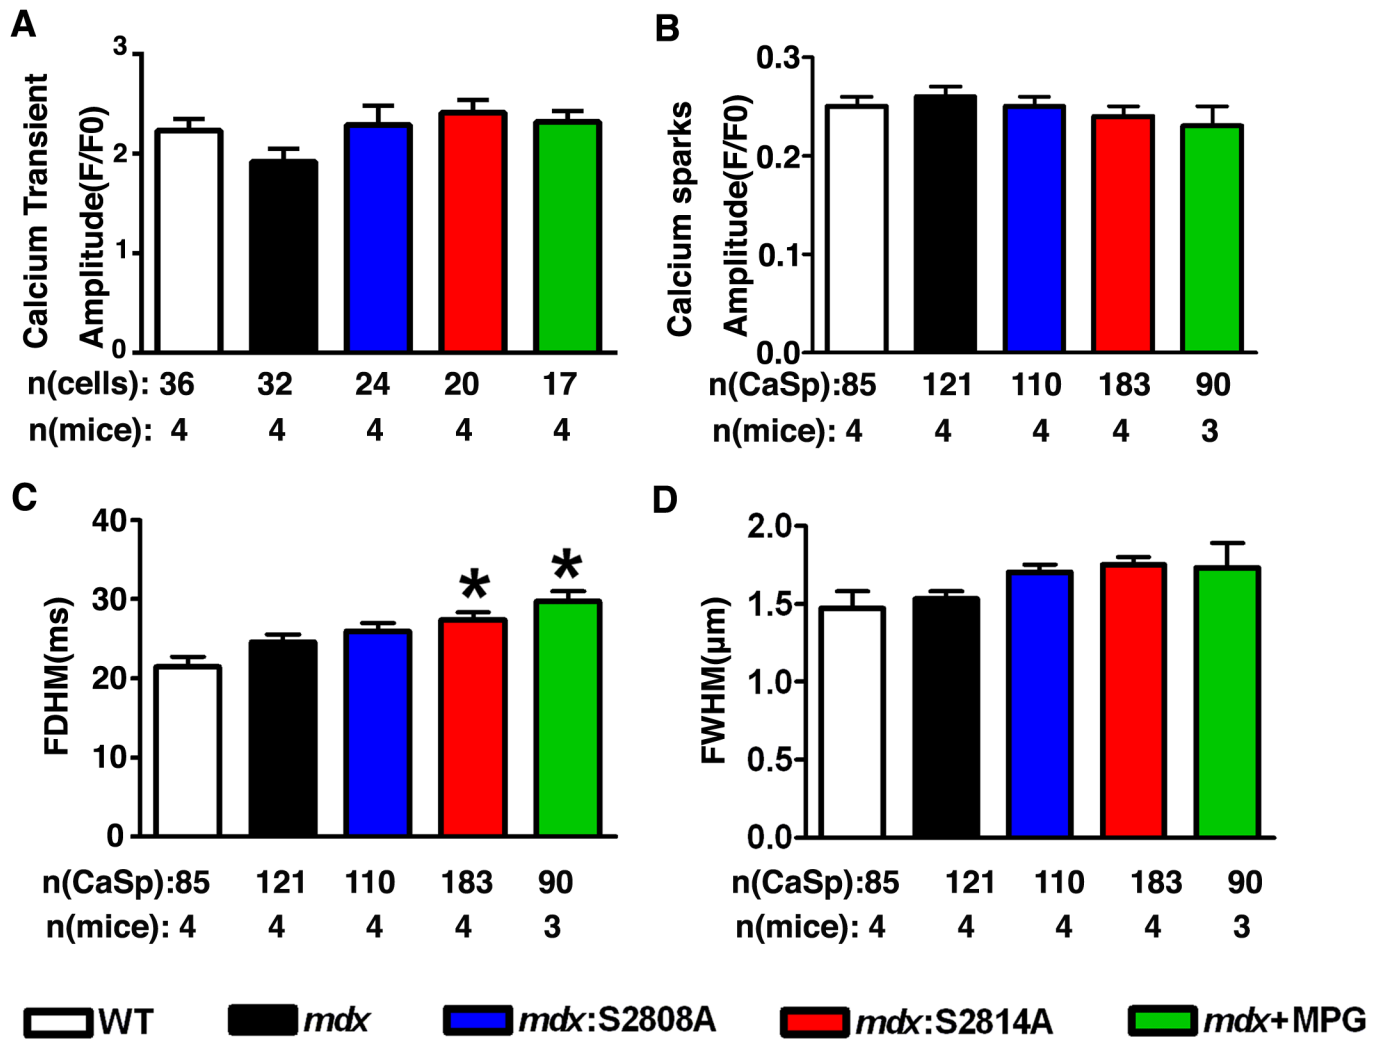

Supplemental Fig 1. ROS scavenger (MPG) as well as inhibition of RyR2 phosphorylation both inhibit Ca sparks in *mdx* mice. Bar graph showing (A) Calcium transients amplitude, (B) Spark amplitude, (C) Full diameter half maximum (FDHM), and (D) Full width half maximum (FWHM) following 1 Hz pacing.

\*p<0.05 vs. WT.

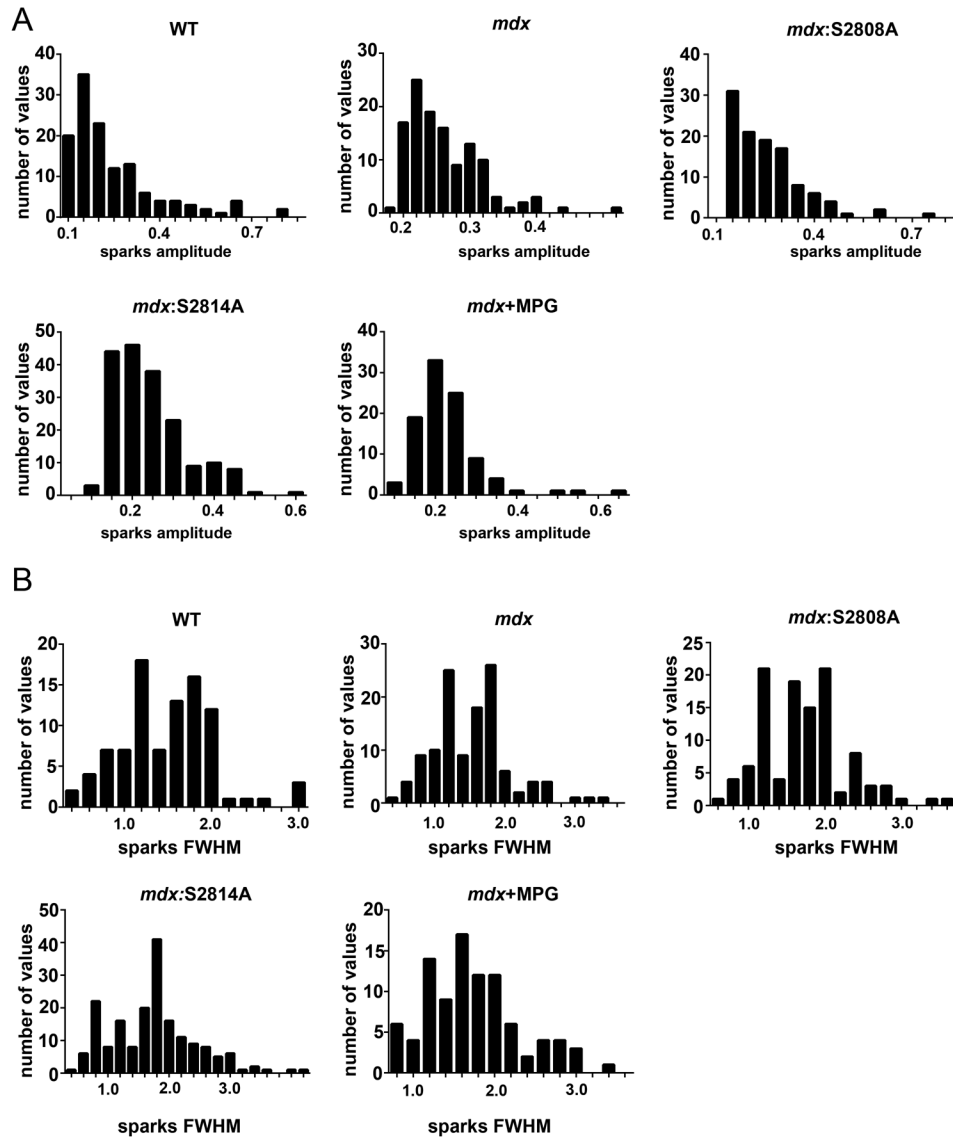

**Supplemental Fig 2. Unaltered Calcium sparks amplitude and FWHM histogram. (A)** Histogram of calcium spark amplitude in WT, *mdx*, *mdx:S2808A*, *mdx:S2814A* and *mdx+MPG*, **(B)** Histogram of calcium sparks FWHM in WT, *mdx*, *mdx:S2808A*, *mdx:S2814A* and *mdx+MPG*.

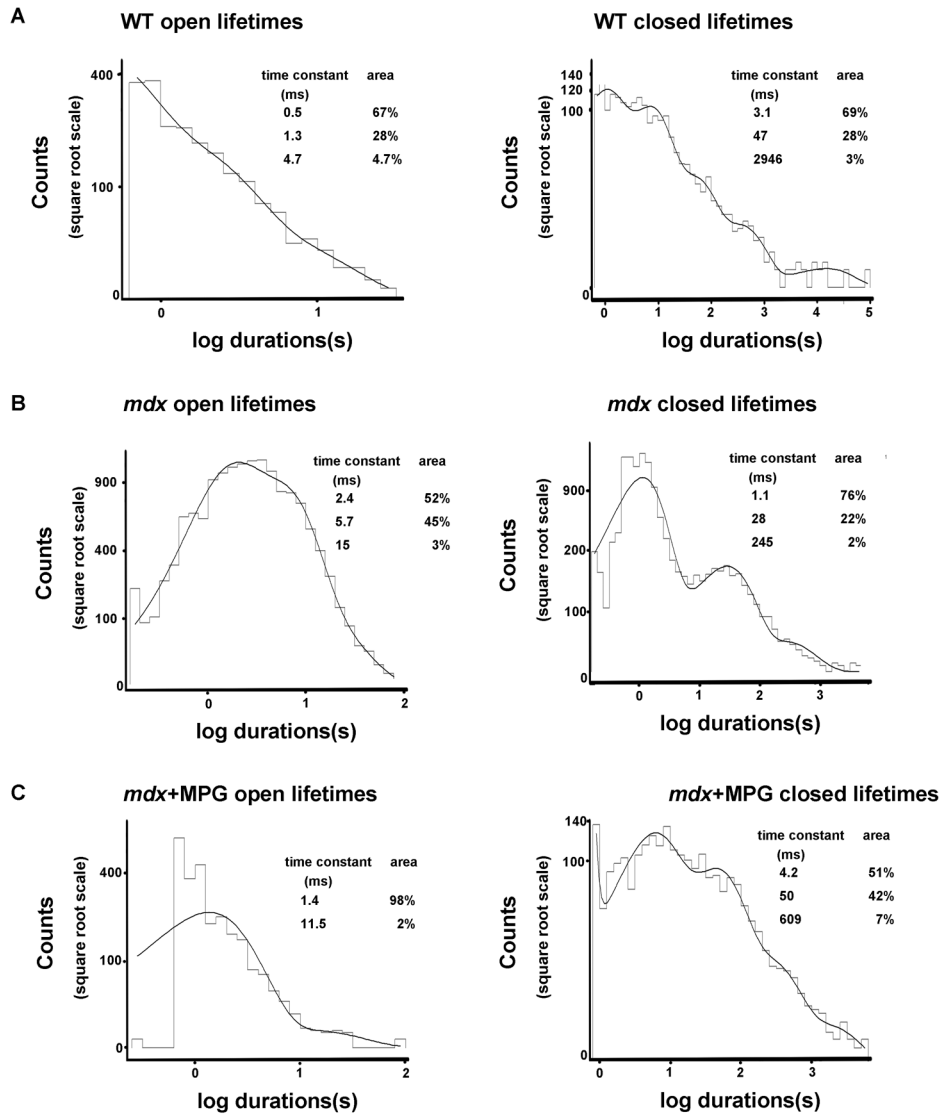

**Supplemental Fig 3. Inhibition of RyR2 oxidation inhibits RyR2 channel lifetimes of open state and increases lifetimes of closed state in *mdx* mice. (A)** Open and closed lifetime distributions and probability density functions (pdf) for a typical single RyR2 channel from WT, **(B)** Open and closed lifetime distributions and pdfs for a typical single RyR2 channel from *mdx*, **(C)** Open and closed lifetime distributions and pdfs for a typical single RyR2 channel from *mdx+MPG*.

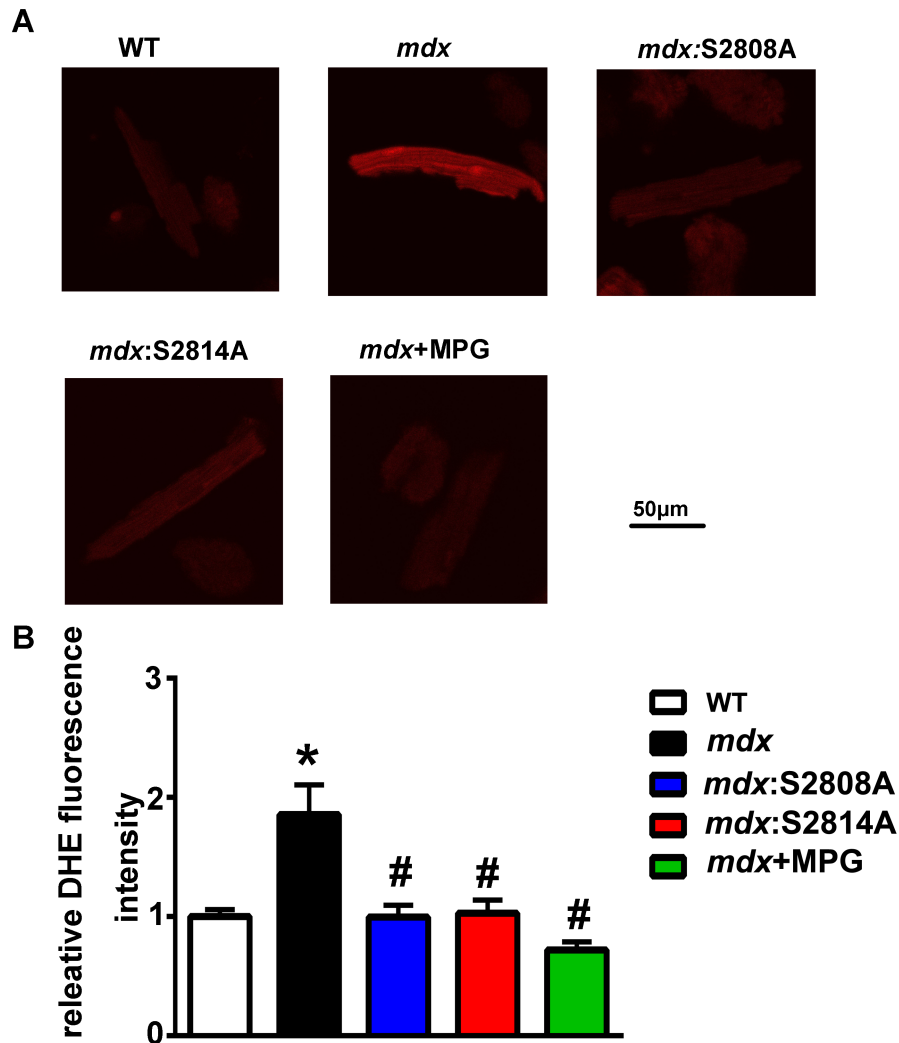

**Supplemental Fig 4. Inhibition of RyR2 phosphorylation reduces ROS production in *mdx* mice. (A)** Representative DHE imaging of cardiomyocytes from WT, *mdx*, *mdx*:S2808A, *mdx*:S2814A mice, and MPG treated *mdx* mice. **(B)** Quantification of normalized DHE fluorescence intensity in cardiomyocytes from WT, *mdx*, *mdx*:S2808A, *mdx*:S2814A mice, and MPG treated *mdx* mice.

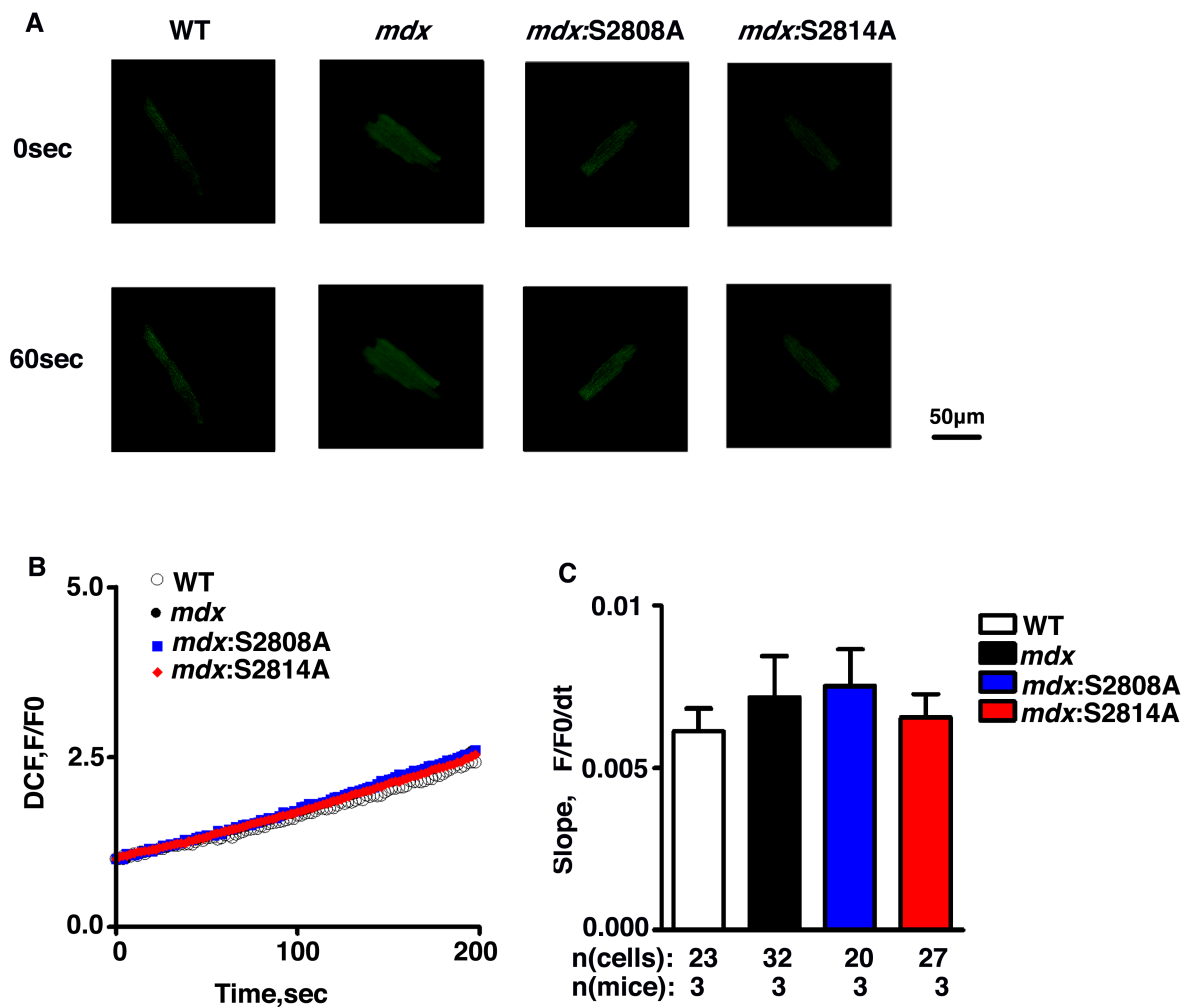

**Supplemental Fig 5. Unaltered ROS production in *mdx* mice at 1 month of age.** (A) Representative DCF imaging of cardiomyocytes from WT, *mdx*, *mdx*:S2808A, and *mdx*:S2814A mice. (B) Representative DCF fluorescence intensity tracing and (C) Quantification of normalized DCF slope in cardiomyocytes from WT, *mdx*, *mdx*:S2808A, and *mdx*:S2814A mice.
